# Supplementary material for: Is MRI/US-guided fusion biopsy ready to replace systematic biopsy in detecting clinically significant prostate carcinoma? – A retrospective study
Source: Research Square preprint supplement (doi:10.21203/rs.3.rs-6466948/v1), 2025-05-07
Supplement: Supplementary file 1 [file 7b5bcfc17c01ba9f5e039f88.docx]

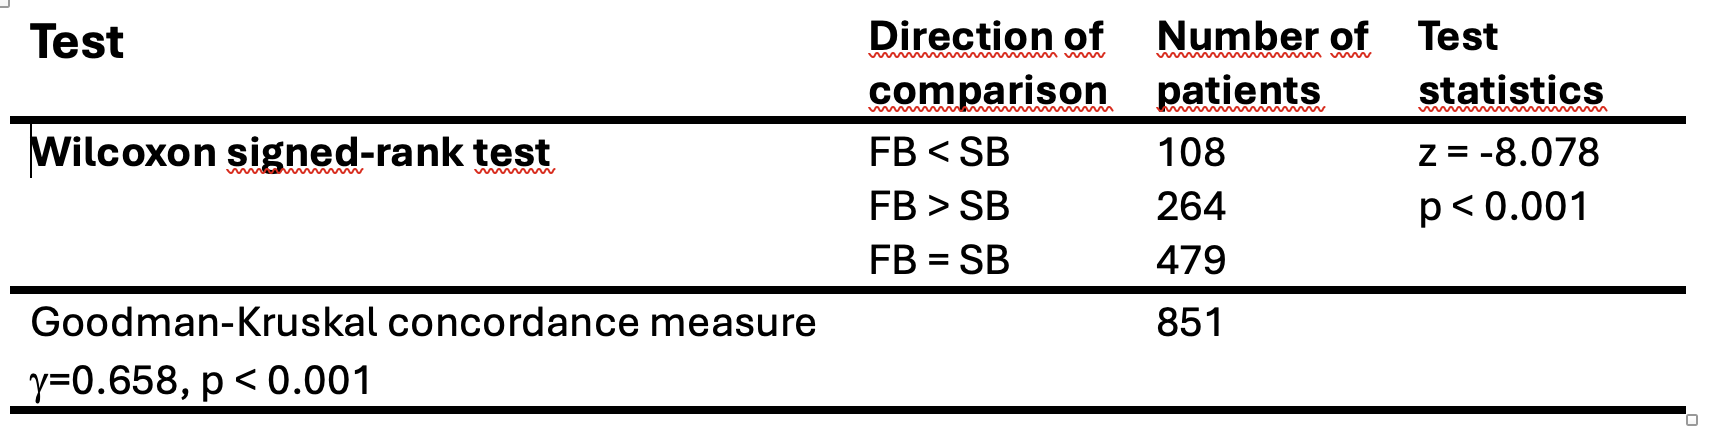


Table S1: Results for detecting the highest ISUP GG using the Goodman and Kruskal´s concordance measure between fusion biopsy (FB) results with systematic biopsy (SB) results.


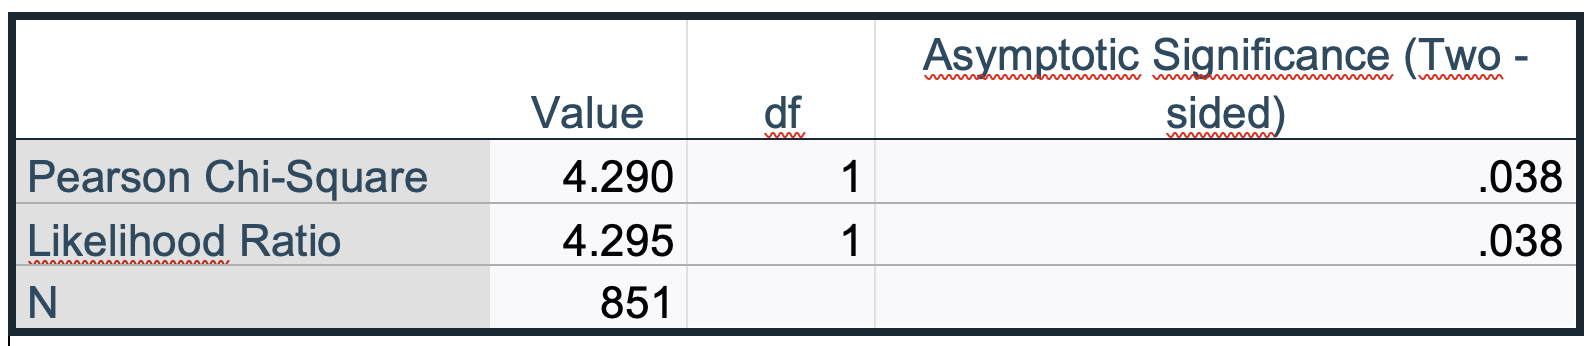

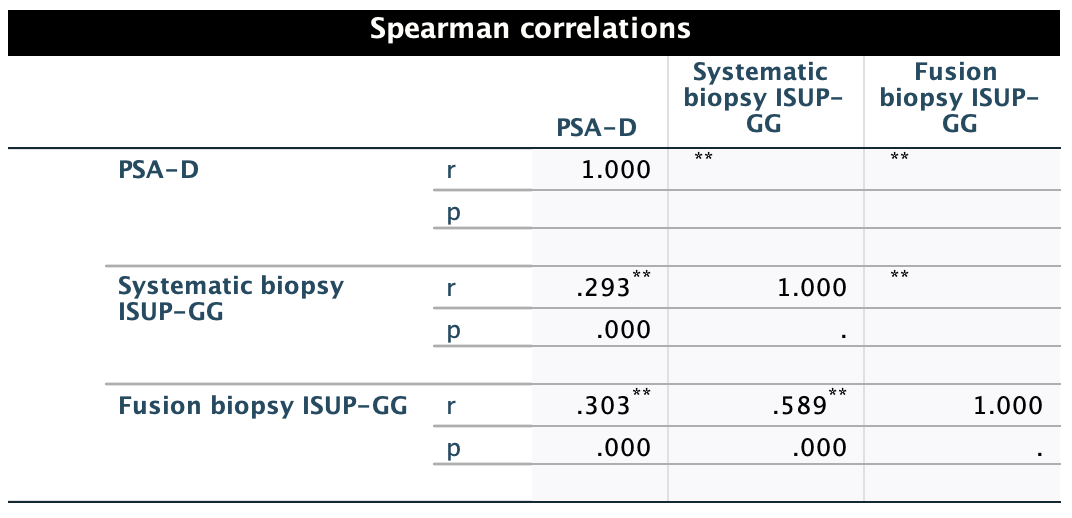


Table S3: Results for the χ2- independence test and the likelihood ratio for the statistical significance between access route and detection rates.

Table S2: Spearman correlations between PSA-D (PSA-density) and ISUP-GG.


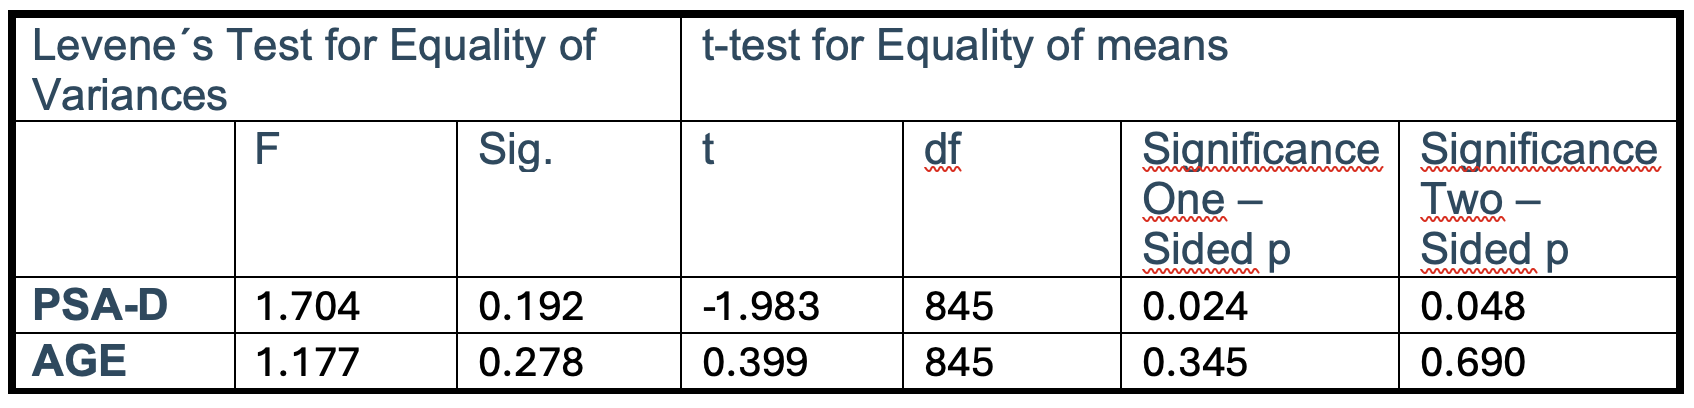


Table S4: Independent sample tests for PSA-D (PSA-density) and age.
